# Supplementary material for: Establishing a Demographic, Development and Environmental Geospatial Surveillance Platform in India: Planning and Implementation
Source: PubMed Central journal article supplement (PMC6231830; doi:10.2196/publichealth.9749), 2018-10-05
Supplement: publichealth_v4i4e66_app3.pdf [file publichealth_v4i4e66_app3.pdf]

**Table S1: Village wise distribution of population, land parcel, subunits and household population occupancy**

| Village        | Population | Land parcel |             |                 |            | Subunit features <sup>a</sup> |             |                 | Household population occupancy |
|----------------|------------|-------------|-------------|-----------------|------------|-------------------------------|-------------|-----------------|--------------------------------|
|                |            | Total       | Residential | Non residential | Mixed      | Total                         | Residential | Non residential |                                |
|                |            | Andhrola    | 3545        | 638             | 392 (61.4) | 218 (34.2)                    | 28 (4.9)    | 819             |                                |
| Aurangabad     | 10,281     | 3202        | 1573 (49.1) | 1489 (46.5)     | 140 (4.4)  | 3690                          | 1976 (53.6) | 1714 (46.4)     | 5                              |
| Bahin          | 7484       | 1951        | 1057 (54.2) | 832 (42.6)      | 62 (3.2)   | 2260                          | 1353 (59.9) | 907 (40.1)      | 6                              |
| Bajaranangla   | 89         | 25          | 13 (52.0)   | 11(44.0)        | 1 (4.0)    | 29                            | 17 (58.6)   | 12 (41.4)       | 5                              |
| Bajdapahari    | 627        | 183         | 83(45.4)    | 83 (45.4)       | 17 (9.3)   | 222                           | 115 (51.8)  | 107 (48.2)      | 5                              |
| Bamnikhera     | 9992       | 2747        | 1488 (54.2) | 1071 (39.0)     | 188 (6.8)  | 3439                          | 2044 (59.4) | 1395 (40.6)     | 5                              |
| Banchari       | 11,288     | 3068        | 1734 (56.5) | 1174 (38.3)     | 160 (5.2)  | 3538                          | 2136 (60.4) | 1402 (39.6)     | 5                              |
| Behrola        | 2386       | 551         | 295 (53.5)  | 221 (40.1)      | 35 (6.4)   | 689                           | 426 (61.8)  | 263 (38.2)      | 6                              |
| Bhamarikhhera  | 287        | 54          | 28 (51.9)   | 19 (35.2)       | 7 (12.9)   | 70                            | 42 (60.0)   | 28 (40.0)       | 7                              |
| Bhamrolajogi   | 1280       | 341         | 177 (51.9)  | 144 (42.2)      | 20 (5.9)   | 394                           | 223 (56.6)  | 171 (43.4)      | 6                              |
| Bhanguri       | 1473       | 455         | 203 (44.6)  | 232 (51.0)      | 20 (4.4)   | 525                           | 259 (49.3)  | 266 (50.6)      | 6                              |
| Bhudpur        | 1080       | 206         | 135(65.5)   | 63 (30.6)       | 8 (3.9)    | 269                           | 194 (72.1)  | 75 (27.9)       | 6                              |
| Chirawata      | 1647       | 439         | 240 (54.7)  | 187 (42.6)      | 12 (2.7)   | 507                           | 297 (58.6)  | 210 (41.4)      | 6                              |
| Dholagarh      | 1471       | 333         | 222 (66.7)  | 94 (28.2)       | 17 (5.1)   | 410                           | 289 (70.5)  | 121 (29.5)      | 5                              |
| Durgapur       | 2438       | 618         | 364 (58.9)  | 224 (36.2)      | 30 (4.9)   | 767                           | 492 (64.1)  | 275 (35.9)      | 5                              |
| Firozpurrajput | 1700       | 418         | 224 (53.6)  | 168 (41.0)      | 26 (6.2)   | 504                           | 305 (60.5)  | 199 (39.5)      | 6                              |
| Garhivinoda    | 618        | 184         | 78 (42.4)   | 99 (53.8)       | 7 (3.8)    | 206                           | 94 (45.6)   | 112 (54.4)      | 7                              |
| Gehlab         | 6532       | 1800        | 929 (51.6)  | 783 (43.5)      | 88 (4.9)   | 2074                          | 1177 (56.8) | 897 (43.2)      | 6                              |
| Gohpur         | 2603       | 496         | 243 (49.0)  | 182 (36.7)      | 71 (14.3)  | 710                           | 421 (59.3)  | 289 (40.7)      | 6                              |
| Gopalgarh      | 927        | 255         | 118 (46.3)  | 125 (49.0)      | 12 (4.7)   | 325                           | 178 (54.8)  | 147 (45.2)      | 5                              |
| Guraksar       | 5780       | 1075        | 678 (63.0)  | 324 (30.1)      | 73 (6.8)   | 1433                          | 1003 (70.0) | 430 (30.0)      | 6                              |
| Jodhpur        | 1704       | 433         | 227 (52.4)  | 193 (44.6)      | 13 (3.0)   | 502                           | 289 (57.6)  | 213 (42.4)      | 6                              |
| Jurali         | 2132       | 419         | 262 (62.5)  | 141 (33.7)      | 16 (3.8)   | 515                           | 350 (68.0)  | 165 (32.0)      | 6                              |
| Kalsada        | 2386       | 587         | 348 (59.9)  | 204 (34.8)      | 35 (6.96)  | 683                           | 435 (63.7)  | 248 (36.3)      | 5                              |
| Kashipur       | 735        | 207         | 108(52.2)   | 92 (44.4)       | 7 (3.38)   | 237                           | 137 (57.8)  | 100 (42.2)      | 5                              |
| Khatela        | 1607       | 383         | 218 (56.9)  | 155 (40.5)      | 10 (2.6)   | 449                           | 280 (62.4)  | 169 (37.6)      | 6                              |
| Khilluka       | 3892       | 721         | 503 (69.7)  | 181 (25.1)      | 37 (5.13)  | 902                           | 679 (75.3)  | 223 (24.7)      | 6                              |
| Kondal         | 6103       | 1740        | 911 (52.4)  | 784 (45.1)      | 45 (2.58)  | 1947                          | 1113 (57.2) | 834 (42.8)      | 5                              |
| Kot            | 9709       | 1618        | 1113 (68.8) | 432 (26.7)      | 73 (4.5)   | 2034                          | 1490 (73.3) | 544 (26.7)      | 7                              |
| Kushlipur      | 3727       | 1112        | 524 (47.1)  | 534 (48.0)      | 54 (4.85)  | 1300                          | 677 (52.1)  | 623 (47.9)      | 6                              |
| Lohina         | 2967       | 840         | 519 (61.7)  | 306 (36.4)      | 15 (1.78)  | 926                           | 603 (65.1)  | 323 (34.9)      | 5                              |
| Manpur         | 8934       | 2214        | 1343 (60.7) | 803 (36.3)      | 68 (3.07)  | 2516                          | 1624 (64.5) | 892 (35.5)      | 6                              |
| Mithaka        | 990        | 159         | 92(57.9)    | 54 (34.0)       | 13 (8.17)  | 218                           | 146 (67.97) | 72 (33.0)       | 7                              |
| Mitrol         | 4980       | 1364        | 773 (56.7)  | 501 (36.7)      | 90 (6.0)   | 1629                          | 996 (61.14) | 633 (38.9)      | 5                              |
| Mohadamka      | 1631       | 253         | 131 (51.8)  | 77 (30.4)       | 45 (17.8)  | 396                           | 260 (65.65) | 136 (34.3)      | 6                              |

|                    |                 |               |                      |                      |                   |               |                      |                      |            |
|--------------------|-----------------|---------------|----------------------|----------------------|-------------------|---------------|----------------------|----------------------|------------|
| Nangaljat          | 4781            | 1178          | 736 (62.4)           | 392 (33.3)           | 50 (4.2)          | 1379          | 915 (66.35)          | 464 (33.6)           | 5          |
| Nanglaahsanpur     | 2817            | 543           | 361 (66.5)           | 165 (30.4)           | 17 (3.1)          | 652           | 465 (71.3)           | 187 (28.7)           | 6          |
| Pachanka           | 3312            | 700           | 337 (48.1)           | 291 (41.6)           | 72 (10.3)         | 901           | 508 (56.38)          | 393 (43.6)           | 7          |
| Pahari             | 2055            | 549           | 313(57.0)            | 222(40.4)            | 14 (2.6)          | 609           | 373 (61.2)           | 236 (38.8)           | 6          |
| Phulwari           | 5810            | 1309          | 539 (41.1)           | 546 (41.7)           | 224 (17.1)        | 1901          | 983 (51.7)           | 918 (48.3)           | 6          |
| Rajpura            | 3411            | 616           | 372 (60.9)           | 207 (33.6)           | 37 (6.0)          | 848           | 577 (68.0)           | 271 (32.0)           | 6          |
| Ratipur            | 1950            | 510           | 270 (52.9)           | 218 (42.7)           | 22 (4.3)          | 638           | 363 (56.9)           | 275 (43.1)           | 5          |
| Rehrana            | 2937            | 697           | 369 (52.9)           | 285 (40.9)           | 43 (6.2)          | 855           | 495 (57.9)           | 360 (42.1)           | 6          |
| Rindika            | 1510            | 359           | 188 (52.4)           | 146 (40.7)           | 25 (7.0)          | 457           | 275 (60.2)           | 182 (39.8)           | 5          |
| Sarai              | 4720            | 789           | 529 (67.0)           | 216 (27.4)           | 44 (5.6)          | 1038          | 752 (72.4)           | 286 (27.6)           | 6          |
| Seoli              | 4508            | 1057          | 623 (58.9)           | 400 (37.8)           | 34 (3.2)          | 1251          | 804 (64.3)           | 447 (35.7)           | 6          |
| Sondhad            | 11,402          | 2512          | 1626 (64.7)          | 814 (32.4)           | 72 (2.9)          | 3162          | 2244 (71.0)          | 918 (29.0)           | 5          |
| Srinagar           | 436             | 237           | 110 (46.4)           | 124 (52.3)           | 3 (1.3)           | 248           | 121 (48.8)           | 127 (51.2)           | 4          |
| Sunder nagar       | 419             | 97            | 66(68.0)             | 28 (28.9)            | 3 (3.1)           | 115           | 84 (73.0)            | 31 (26.9)            | 5          |
| Tikribrahmin       | 6360            | 1486          | 817(55.0)            | 607 (40.8)           | 62 (4.2)          | 1794          | 1089 (60.7)          | 705 (39.3)           | 6          |
| Uttawar            | 18,249          | 3279          | 1761 (53.7)          | 1255 (38.3)          | 263 (8.0)         | 4383          | 2755 (62.9)          | 1628 (37.1)          | 7          |
| <b>Total</b>       | <b>1,99,702</b> | <b>47,007</b> | <b>26,363 (56.1)</b> | <b>18,116 (38.5)</b> | <b>2528 (5.4)</b> | <b>57,365</b> | <b>35,489 (61.9)</b> | <b>21,876 (38.1)</b> | <b>6</b>   |
| <b>Mean</b>        | <b>3916</b>     | <b>922</b>    | <b>517</b>           | <b>355</b>           | <b>50</b>         | <b>1125</b>   | <b>696</b>           | <b>429</b>           | <b>6</b>   |
| <b>SD</b>          | <b>3673</b>     | <b>858</b>    | <b>479</b>           | <b>345</b>           | <b>56</b>         | <b>1045</b>   | <b>644</b>           | <b>416</b>           | <b>0.7</b> |
| <b>Median</b>      | <b>2603</b>     | <b>587</b>    | <b>348</b>           | <b>218</b>           | <b>34</b>         | <b>710</b>    | <b>465</b>           | <b>266</b>           | <b>6</b>   |
| <b>Range (min)</b> | <b>89</b>       | <b>25</b>     | <b>13</b>            | <b>11</b>            | <b>1</b>          | <b>29</b>     | <b>17</b>            | <b>12</b>            | <b>4</b>   |
| <b>Range (max)</b> | <b>18,249</b>   | <b>3279</b>   | <b>1761</b>          | <b>1489</b>          | <b>263</b>        | <b>4383</b>   | <b>2755</b>          | <b>1714</b>          | <b>7</b>   |

<sup>a</sup>Figure include 5441 (4491 locked and 950 abandoned) unused structures at the time of survey.

| Table S3: Village wise characterization and profiling of structural concentration zone |              |                                |                                                  |                                           |                                    |                             | ghbour index |
|----------------------------------------------------------------------------------------|--------------|--------------------------------|--------------------------------------------------|-------------------------------------------|------------------------------------|-----------------------------|--------------|
| SI No                                                                                  | Village Name | Village area <sup>b</sup> (ha) | Structural Concentration Zone <sup>a</sup> (SCZ) |                                           |                                    |                             |              |
|                                                                                        |              |                                | Buffer (m)                                       | Area covered ha (% of total village area) | Number of land Parcel (% of total) | Land parcel density (lp/ha) |              |
| 1                                                                                      | Andhrola     | 287.5                          | 300                                              | 28 (9.8)                                  | 537 (84.2)                         | 19                          | 0.48         |
| 2                                                                                      | Aurangabad   | 1630.2                         | 650                                              | 133 (8.1)                                 | 2614 (81.6)                        | 20                          | 0.39         |
| 3                                                                                      | Bahin        | 2050.4                         | 550                                              | 95 (4.6)                                  | 1646 (84.4)                        | 17                          | 0.30         |
| 4                                                                                      | Bajaranangl  | 23.3                           | 200                                              | 13 (53.9)                                 | 20 (80.0)                          | 2                           | 1.01         |
| 5                                                                                      | Bajdapahari  | 263.3                          | 300                                              | 20 (7.5)                                  | 149 (81.4)                         | 8                           | 0.51         |
| 6                                                                                      | Bamnikhera   | 764.1                          | 600                                              | 113 (14.8)                                | 2206 (80.3)                        | 20                          | 0.44         |
| 7                                                                                      | Banchari     | 1514.8                         | 500                                              | 79 (5.2)                                  | 2516 (82.0)                        | 32                          | 0.86         |
| 8                                                                                      | Behrola      | 283.7                          | 550                                              | 113 (39.9)                                | 445(80.8)                          | 4                           | 0.36         |
| 9                                                                                      | Bhamarikhher | 31.1                           | 200                                              | 13 (40.4)                                 | 46 (85.0)                          | 4                           | 0.50         |
| 10                                                                                     | Bhamrolajogi | 300.5                          | 175                                              | 10 (3.2)                                  | 266 (78.0)                         | 28                          | 0.40         |
| 11                                                                                     | Bhanguri     | 400.5                          | 220                                              | 15 (3.8)                                  | 378 (83.1)                         | 25                          | 0.44         |
| 12                                                                                     | Bhudpur      | 108.3                          | 125                                              | 5 (4.5)                                   | 157 (76.2)                         | 32                          | 0.69         |
| 13                                                                                     | Chirawata    | 124.9                          | 200                                              | 13 (10.1)                                 | 362 (82.5)                         | 29                          | 0.51         |
| 14                                                                                     | Dholagarh    | 41.9                           | 300                                              | 28 (67.5)                                 | 268 (80.5)                         | 9                           | 0.46         |
| 15                                                                                     | Durgapur     | 340.3                          | 250                                              | 20 (5.8)                                  | 473 (76.5)                         | 24                          | 0.42         |
| 16                                                                                     | Firozpur     | 300                            | 200                                              | 13(4.2)                                   | 355 (84.9)                         | 28                          | 0.36         |
| 17                                                                                     | Garhivinoda  | 191.5                          | 250                                              | 20 (10.3)                                 | 144 (78.3)                         | 7                           | 0.39         |
| 18                                                                                     | Gehlab       | 1045.2                         | 400                                              | 50 (4.8)                                  | 1484 (82.4)                        | 30                          | 0.39         |
| 19                                                                                     | Gohpur       | 112.2                          | 250                                              | 20 (17.5)                                 | 418 (84.3)                         | 21                          | 0.62         |
| 20                                                                                     | Gopalgarh    | 270.1                          | 350                                              | 38 (14.2)                                 | 194 (76.1)                         | 5                           | 0.45         |
| 21                                                                                     | Guraksar     | 354.5                          | 350                                              | 38 (10.9)                                 | 895 (83.3)                         | 23                          | 0.49         |
| 22                                                                                     | Jodhpur      | 277                            | 300                                              | 28 (10.2)                                 | 339(78.3)                          | 12                          | 0.44         |
| 23                                                                                     | Jurali       | 102.5                          | 200                                              | 13 (12.3)                                 | 325 (77.6)                         | 26                          | 0.63         |
| 24                                                                                     | Kalsada      | 294.2                          | 250                                              | 20 (6.7)                                  | 492 (83.8)                         | 25                          | 0.43         |
| 25                                                                                     | Kashipur     | 87.9                           | 150                                              | 7 (8.0)                                   | 165 (79.7)                         | 23                          | 0.53         |
| 26                                                                                     | Khatela      | 274.9                          | 225                                              | 16 (5.8)                                  | 296 (77.3)                         | 19                          | 0.29         |
| 27                                                                                     | Khilluka     | 181.9                          | 250                                              | 20 (10.8)                                 | 572(79.3)                          | 29                          | 0.56         |
| 28                                                                                     | Kondal       | 1199.9                         | 450                                              | 64 (5.3)                                  | 1393 (80.1)                        | 17                          | 0.43         |
| 29                                                                                     | Kot          | 949.1                          | 500                                              | 79 (8.3)                                  | 1311 (81.0)                        | 11                          | 0.48         |
| 30                                                                                     | Kushlipur    | 333.3                          | 500                                              | 79 (23.6)                                 | 895 (80.5)                         | 8                           | 0.54         |
| 31                                                                                     | Lohina       | 1337.8                         | 500                                              | 79 (5.9)                                  | 635 (75.6)                         | 29                          | 0.39         |
| 32                                                                                     | Manpur       | 1577                           | 450                                              | 64 (4.0)                                  | 1814 (81.9)                        | 20                          | 0.30         |
| 33                                                                                     | Mithaka      | 51.8                           | 140                                              | 6 (11.9)                                  | 126 (79.2)                         | 20                          | 0.74         |
| 34                                                                                     | Mitrol       | 503.3                          | 400                                              | 50(10.0)                                  | 1108 (81.2)                        | 22                          | 0.45         |
| 35                                                                                     | Mohadamka    | 94.6                           | 180                                              | 10 (10.8)                                 | 206 (81.4)                         | 21                          | 0.40         |
| 36                                                                                     | Nangaljat    | 524                            | 400                                              | 50 (9.6)                                  | 963 (81.7)                         | 24                          | 0.40         |



**Table S4: Village wise waste density**

| <b>Block</b> | <b>Village</b>  | <b>Solid waste (N)</b> | <b>Liquid waste (N)</b> | <b>Total waste (N)</b> | <b>Total Population (N)</b> | <b>Solid waste density per 100 population</b> | <b>Liquid waste density per 100 population</b> | <b>Total waste density per 100_population</b> |
|--------------|-----------------|------------------------|-------------------------|------------------------|-----------------------------|-----------------------------------------------|------------------------------------------------|-----------------------------------------------|
| Hathin       | Andhrola        | 17                     | 69                      | 86                     | 3545                        | 0.48                                          | 1.95                                           | 2.43                                          |
| Hathin       | Bahin           | 43                     | 215                     | 258                    | 7484                        | 0.57                                          | 2.87                                           | 3.45                                          |
| Hathin       | Bazara Pahari   | 12                     | 14                      | 26                     | 627                         | 1.91                                          | 2.23                                           | 4.15                                          |
| Hathin       | Bhamrola Jogi   | 20                     | 102                     | 122                    | 1280                        | 1.56                                          | 7.97                                           | 9.53                                          |
| Hathin       | Bhanguri        | 8                      | 39                      | 47                     | 1473                        | 0.54                                          | 2.65                                           | 3.19                                          |
| Hathin       | Budhpur         | 6                      | 33                      | 39                     | 1080                        | 0.56                                          | 3.06                                           | 3.61                                          |
| Hathin       | Firojpur Rajput | 9                      | 46                      | 55                     | 1700                        | 0.53                                          | 2.71                                           | 3.24                                          |
| Hathin       | Garhi Vinoda    | 7                      | 11                      | 18                     | 618                         | 1.13                                          | 1.78                                           | 2.91                                          |
| Hathin       | Gehlab          | 39                     | 196                     | 235                    | 6532                        | 0.60                                          | 3.00                                           | 3.60                                          |
| Hathin       | Gohpur          | 19                     | 91                      | 110                    | 2603                        | 0.73                                          | 3.50                                           | 4.23                                          |
| Hathin       | Gurakshar       | 16                     | 176                     | 192                    | 5780                        | 0.28                                          | 3.04                                           | 3.32                                          |
| Hathin       | Jurali          | 9                      | 57                      | 66                     | 2132                        | 0.42                                          | 2.67                                           | 3.10                                          |
| Hathin       | kalsara         | 17                     | 93                      | 110                    | 2386                        | 0.71                                          | 3.90                                           | 4.61                                          |
| Hathin       | Khilluka        | 13                     | 140                     | 153                    | 3892                        | 0.33                                          | 3.60                                           | 3.93                                          |
| Hathin       | Kondal          | 27                     | 256                     | 283                    | 6103                        | 0.44                                          | 4.19                                           | 4.64                                          |
| Hathin       | Kot             | 44                     | 157                     | 201                    | 9709                        | 0.45                                          | 1.62                                           | 2.07                                          |
| Hathin       | Manpur          | 43                     | 348                     | 391                    | 8934                        | 0.48                                          | 3.90                                           | 4.38                                          |
| Hathin       | Meethaka        | 5                      | 53                      | 58                     | 990                         | 0.51                                          | 5.35                                           | 5.86                                          |
| Hathin       | Modhamka        | 4                      | 45                      | 49                     | 1631                        | 0.25                                          | 2.76                                           | 3.00                                          |
| Hathin       | Nangalijat      | 40                     | 156                     | 196                    | 4781                        | 0.84                                          | 3.26                                           | 4.10                                          |
| Hathin       | pachanka        | 21                     | 95                      | 116                    | 3312                        | 0.63                                          | 2.87                                           | 3.50                                          |
| Hathin       | pahari          | 21                     | 84                      | 105                    | 2055                        | 1.02                                          | 4.09                                           | 5.11                                          |
| Hathin       | Rindka          | 1                      | 46                      | 47                     | 1510                        | 0.07                                          | 3.05                                           | 3.11                                          |
| Hathin       | Uttawar         | 77                     | 360                     | 437                    | 18249                       | 0.42                                          | 1.97                                           | 2.39                                          |
| Hodal        | Aurangabad      | 74                     | 293                     | 367                    | 10281                       | 0.72                                          | 2.85                                           | 3.57                                          |
| Hodal        | Bajara Nangla   | 3                      | 3                       | 6                      | 89                          | 3.37                                          | 3.37                                           | 6.74                                          |
| Hodal        | Bamnikhera      | 60                     | 238                     | 298                    | 9992                        | 0.60                                          | 2.38                                           | 2.98                                          |
| Hodal        | Banchari        | 32                     | 241                     | 273                    | 11288                       | 0.28                                          | 2.14                                           | 2.42                                          |
| Hodal        | Behrola         | 16                     | 64                      | 80                     | 2386                        | 0.67                                          | 2.68                                           | 3.35                                          |
| Hodal        | Bhamarikheda    | 5                      | 20                      | 25                     | 287                         | 1.74                                          | 6.97                                           | 8.71                                          |
| Hodal        | Gopalgarh       | 7                      | 10                      | 17                     | 927                         | 0.76                                          | 1.08                                           | 1.83                                          |
| Hodal        | Khatela         | 17                     | 1                       | 18                     | 1607                        | 1.06                                          | 0.06                                           | 1.12                                          |
| Hodal        | Lohina          | 26                     | 138                     | 164                    | 2967                        | 0.88                                          | 4.65                                           | 5.53                                          |
| Hodal        | Mitrol          | 19                     | 125                     | 144                    | 4980                        | 0.38                                          | 2.51                                           | 2.89                                          |
| Hodal        | Nangla Ahsanpur | 33                     | 152                     | 185                    | 2817                        | 1.17                                          | 5.40                                           | 6.57                                          |
| Hodal        | Phulwari        | 48                     | 234                     | 282                    | 5810                        | 0.83                                          | 4.03                                           | 4.85                                          |
| Hodal        | sarai           | 21                     | 116                     | 137                    | 4720                        | 0.44                                          | 2.46                                           | 2.90                                          |
| Hodal        | Seoli           | 39                     | 103                     | 142                    | 4508                        | 0.87                                          | 2.28                                           | 3.15                                          |
| Hodal        | Sondh           | 73                     | 223                     | 296                    | 11402                       | 0.64                                          | 1.96                                           | 2.60                                          |
| Hodal        | Srinagar        | 14                     | 10                      | 24                     | 436                         | 3.21                                          | 2.29                                           | 5.50                                          |
| Hodal        | Sundarnagar     | 5                      | 9                       | 14                     | 419                         | 1.19                                          | 2.15                                           | 3.34                                          |
